# Supplementary material for: Endothelial Klf2-Foxp1-TGFβ signal mediates the inhibitory effects of simvastatin on maladaptive cardiac remodeling
Source: PubMed Central journal article supplement (PMC7778601; doi:10.7150/thno.48153), 2021-01-01

1 SUPPLEMENTARY MATERIAL

2 **Endothelial Klf2-Foxp1-TGF $\beta$  signal mediates the inhibitory effects of simvastatin on**  
3 **maladaptive cardiac remodeling**

4  
5 **Running Title:** Li et al.; Endothelial Klf2-Foxp1 and simvastatin's cardiac remodeling prevention

6 Hongda Li, BSc<sup>1,†</sup>; Yanfang Wang, MD<sup>1,†</sup>; Jiwen Liu, MD<sup>1,†</sup>; Xiaoli Chen, MD<sup>1</sup>; Yunhao Duan, BSc<sup>1</sup>;  
7 Xiaoyu Wang, MD<sup>1</sup>; Yajing Shen, PhD<sup>3</sup>; Yashu Kuang, MD<sup>1</sup>; Tao Zhuang, PhD<sup>1</sup>; Brain Tomlinson,  
8 PhD<sup>4</sup>; Paul Chan, MD, PhD<sup>5</sup>; Zuoren Yu, MD, PhD<sup>1</sup>; Yu Cheng, PhD<sup>3</sup>; Lin Zhang, MD, PhD<sup>1</sup>;  
9 Zhongmin Liu, MD, PhD<sup>1</sup>; Yuzhen Zhang, MD, PhD<sup>1</sup>; Zhenlin Zhao, PhD<sup>6,\*</sup>; Qi Zhang, MD, PhD<sup>2,\*</sup>;  
10 Jie Liu, PhD<sup>1,6,\*</sup>

11 <sup>1</sup>Key Laboratory of Arrhythmias of the Ministry of Education of China, Research Center for  
12 Translational Medicine, Shanghai East Hospital, Tongji University School of Medicine, Shanghai,  
13 China;

14 <sup>2</sup>Department of Cardiology, Shanghai East Hospital, Tongji University School of Medicine, Shanghai,  
15 China;

16 <sup>3</sup>Institute for Biomedical Engineering and Nano Science, Tongji University School of Medicine,  
17 Shanghai, China;

18 <sup>4</sup>Faculty of Medicine, Macau University of Science and Technology, Macau SAR, China;

19 <sup>5</sup>Division of Cardiology, Department of Internal Medicine, Wan Fang Hospital, Taipei Medical  
20 University, Taipei, Taiwan;

21 <sup>6</sup>Shenzhen Ruipuxun Academy for Stem Cell and Regenerative Medicine, Shenzhen, China.

22  
23 † These authors contributed equally to this work.

24 \*To whom correspondence should be addressed:

25 Jie Liu, PhD

26 Key Laboratory of Arrhythmias of the Ministry of Education of China

27 Research Center for Translational Medicine

28 Shanghai East Hospital, Tongji University School of Medicine,

29 150 Jimo Rd, Pudong New District, Shanghai, 200120, China

30 Tel:86-21-61569673

31 E-mail: [kenliujie@126.com](mailto:kenliujie@126.com)

1 Qi Zhang, MD, PhD  
2 Department of Cardiology,  
3 Shanghai East Hospital, Tongji University School of Medicine,  
4 150 Jimo Rd, Pudong New District, Shanghai, 200120, China  
5 E-mail: [zhangqnh@hotmail.com](mailto:zhangqnh@hotmail.com)

6  
7 Zhenlin Zhao, PhD  
8 Shenzhen Ruipuxun Academy for Stem Cell and Regenerative Medicine  
9 14 Jinhui Rd, Pingshan New District, Shenzhen, 518122, China  
10 E-mail: zhaozl2006@163.com

11

1 **Supplementary Tables:**

2 **Supplementary Table 1: Primer sequence for real time quantitative PCR (RT-qPCR)**

| Gene Name              | Primer Sequence |                               |
|------------------------|-----------------|-------------------------------|
| <i>α-SMA-mus</i>       | Forward         | 5'-GTCCCAGACATCAGGGAGTAA-3'   |
|                        | Reverse         | 5'-TCGGATACTTCAGCGTCAGGA-3'   |
| <i>Vimentin-mus</i>    | Forward         | 5'-GGATCAGCTCACCAACGACA-3'    |
|                        | Reverse         | 5'-AAGGTCAAGACGTGCCAGAG-3'    |
| <i>Fibronectin-mus</i> | Forward         | 5'-TTCAAGTGTGATCCCCATGAAG-3'  |
|                        | Reverse         | 5'-CAGGTCTACGGCAGTTGTCA-3'    |
| <i>Colla1-mus</i>      | Forward         | 5'-GCTCCTCTTAGGGGCCACT-3'     |
|                        | Reverse         | 5'-ATTGGGGACCCTTAGGCCAT-3'    |
| <i>Col3a1-mus</i>      | Forward         | 5'-CTGTAACATGGAAACTGGGGAAA-3' |
|                        | Reverse         | 5'-CCATAGCTGAACTGAAAACCACC-3' |
| <i>ANP-mus</i>         | Forward         | 5'-GCTTCCAGGCCATATTGGAG-3'    |
|                        | Reverse         | 5'-GGGGGCATGACCTCATCTT-3'     |
| <i>BNP-mus</i>         | Forward         | 5'-GAGGTCACCTCCTATCCTCTGG-3'  |
|                        | Reverse         | 5'-GCCATTTCTCCGACTTTTCTC-3'   |
| <i>Myh6-mus</i>        | Forward         | 5'-GCCCAGTACCTCCGAAAGTC-3'    |
|                        | Reverse         | 5'-ATCAGGCACGAAGCACTCC-3'     |
| <i>Myh7-mus</i>        | Forward         | 5'-TGGGGCAGAGCTTCAGTTG-3'     |
|                        | Reverse         | 5'-TGGGGCAGGAGAACTTTGC-3'     |
| <i>TGFβ1-mus</i>       | Forward         | 5'-AGCTGCGCTTGCAGAGATTA-3'    |
|                        | Reverse         | 5'-AGCCCTGTATTCCGTCTCCT-3'    |
| <i>Klf2-mus</i>        | Forward         | 5'-CGCCTCGGGTTCATTTTC-3'      |
|                        | Reverse         | 5'-AGCCTATCTTGCCGTCCTTT-3'    |
| <i>GAPDH-mus</i>       | Forward         | 5'-AGGTCGGTGTGAACGGATTTG-3'   |
|                        | Reverse         | 5'-GGGGTCGTTGATGGCAACA-3'     |

3

1 **Supplementary Table 2: Sequence of gene-siRNA**

| Gene            | Sequence                    |
|-----------------|-----------------------------|
| <i>Scramble</i> | 5'-UUCUCCGAACGUGUCACGUTT-3' |
|                 | 5'-ACGUGACACGUUCGGAGAATT-3' |
| <i>Klf2-mus</i> | 5'-GACCCUUUCAGUGCCACUUTT-3' |
|                 | 5'-AAGUGGCACUGAAAGGGUCTT-3' |

2

3 **Supplementary Table 3: Sequence for gene-shRNA**

| Gene            | Sequence                  |
|-----------------|---------------------------|
| <i>Scramble</i> | 5'-TTCTCCGAACGTGTACGT-3'  |
| <i>Klf2-mus</i> | 5'-GCACGGATGAGGACCTAAA-3' |

4

5 **Supplementary Table 4: Primer sequence for chromatin immunoprecipitation (ChIP) assays**

| Promoter     | Primer Sequence                    |
|--------------|------------------------------------|
| <i>TGFβ1</i> | Forward 5'-CTGCAAAGGCACTAAGACT-3'  |
|              | Reverse 5'-CAACGTATCACCTCACAA-3'   |
| <i>GAPDH</i> | Forward 5'-CCCTACCCACCTCCATTAT-3'  |
|              | Reverse 5'-TGGTGGGTGGAGTTTTCTTC-3' |

6

7 **Supplementary Table 5: Primer sequence for amplification of Klf2 binding promoter sequence**

8 **in luciferase reporter assays**

| Gene         | Primer Sequence                   |
|--------------|-----------------------------------|
| <i>TGFβ1</i> | Forward 5'-AGGGTGATACGTTGGAAG-3'  |
|              | Reverse 5'-GCCACTAGAAACCTAACGA-3' |

9



1 **Supplementary Figure legends**

2 **Supplementary Figure 1.** Mouse cardiac microvascular endothelial cells (mCMVECs), cardiomyocytes  
3 (MCMs), fibroblasts (MCFs) and macrophages (MMA-bm) were treated with simvastatin (1  $\mu$ M) or  
4 vehicle control for 24 hrs. RT-qPCR shows simvastatin induced a robust elevation of Klf2 expression  
5 ECs, but only with mild elevation in macrophages and no significant changes of Klf2 expression in  
6 cardiomyocytes and fibroblasts (n=5). Data are means  $\pm$  S.E.M. \*\* $P$ <0.01, \*  $P$ <0.05 and n.s. not  
7 significant. Unpaired Student's t-test.

8 **Supplementary Figure 2. Successful target delivery of KLF2-siRNA by RGD-peptide magnetic**  
9 **nanoparticles into cardiac microvascular endothelial cells for KLF2 inhibition *in vivo*.** **A,** RGD-  
10 Fe<sub>3</sub>O<sub>4</sub> magnetic nanoparticles are successfully delivered to cardiac microvascular ECs shown by Cy5.5  
11 label (arrow head, 3rd panel) and Perlus staining of Fe (4th panel) containing in the nanoparticles in  
12 cardiac sections. **B-C,** RGD nanoparticle packaging KLF2-siRNA target delivery reduces the expression  
13 of KLF2 by RT-qPCR in cardiac ECs (B), with no significant change of KLF2 expression in the  
14 remaining cardiac components when ECs were removed (C) (n=5). Data are means  $\pm$  S.E.M. \*\*  $P$ <0.01  
15 and n.s. not significant. Unpaired Student's t-test. Scale bar: A: 20  $\mu$ m.

16 **Supplementary Figure 3. Representative images of echocardiography from the mouse groups. A-**  
17 **C,** Representative images from the mouse groups of M Model across the Parasternal long axis, pulsed  
18 wave Doppler (PWD) across the mitral flow and tissue Doppler (TD) of mitral vavle ring at the 28<sup>th</sup> day  
19 after TAC or sham operation.

20 **Supplementary Figure 4.** The representative image of simvastatin treated mouse cardiac microvascular  
21 endothelial cell line (mCMVECs) conditioned medium (CM), mCMVEC-CM, significantly inhibits the  
22 TGF $\beta$  stimulated mCMVEC-CM enhanced cardiac fibroblast migration by wound healing assay, with  
23 no significant change between simvastatin and vehicle treatment upon PBS stimulation (n=5). Scale bars:  
24 100  $\mu$ m.

25 **Supplementary Figure 5.** The simvastatin treated mCMVEC-CM significantly reduces the expression  
26 of other extracellular matrix (ECM) genes such as vimentin (Vim) and fibronectin (Fn), collagen type I  
27 alpha 1 subunit (Col1a1), collagen type III alpha 1 subunit (Col3a1) compared with vehicle treated  
28 mCMVEC-CM upon TGF $\beta$  stimulation, while no significant changes were observed in mCMVECs  
29 between simvastatin and vehicle treatment upon PBS stimulation (n=5). Data are means  $\pm$  S.E.M.  
30 \*\* $P$ <0.01 and n.s. not significant. 2-way ANOVA with Turkey test.

1 **Supplementary Figure 6.** The representative image of the condition medium (CM) from Krüppel like  
2 factor (Klf2) knockdown lentiviral Klf2-shRNA infected mCMVECs attenuates the simvastatin-  
3 mediated inhibition of increased cardiac fibroblast migration by wound healing assay upon TGFβ  
4 stimulation (n=5). Scale bars: 100 μm.

5 **Supplementary Figure 7.** CM from Klf2 knockdown lentiviral Klf2-shRNA infected mCMVECs  
6 attenuates the simvastatin-mediated reduced expression of extracellular matrix (ECM) genes such as  
7 vimentin (Vim) and fibronectin (Fn), collagen type I alpha 1 subunit (Col1a1), collagen type III alpha 1  
8 subunit (Col3a1) in cardiac fibroblasts upon that of TGFβ stimulation compared with the CM from  
9 scramble-shRNA infected mCMVECs (n=5). Data are means ± S.E.M. \**P*<0.05 and \*\**P*<0.01. 2-way  
10 ANOVA with Turkey test.

11 **Supplementary Figure 8. Klf2 mediates the inhibitory effect of simvastatin on AngII-induced**  
12 **TGFβ1 expression in mCMVECs and Klf2 overexpression inhibits TGFβ-induced mCMVEC-CM**  
13 **enhanced migration, proliferation and fibrotic gene expression of cardiac fibroblasts and**  
14 **attenuated the fetal genes reactivation in cardiomyocytes. A,** RT-qPCR results showed that AngII  
15 reduces Klf2 expression, but increases TGFβ1 expression in mCMVECs and simvastatin reverses the  
16 AngII-mediated reduction of Klf2, but reduces the AngII-mediated elevation of TGF-β1 expression. And  
17 the Klf2 inhibition by shRNA reverses the simvastatin-mediated reduction of AngII elevated TGF-β1  
18 expression (n=3). **B-C,** Klf2-overexpression lentivirus vector (Lenti-KLF2) significantly elevates the  
19 Klf2 expression in mCMVECs by RT-qPCR (**B**) and western blot (**C**) compared with scramble vector  
20 infection (n=3). **D,** RT-qPCR results showed significantly downregulated AngII-stimulated TGF-β1  
21 expression in KLF2 overexpressing ECs. (n=3) **E-G,** Klf2 overexpression in mCMVECs attenuates the  
22 TGF-β1 stimulated mCMVECs-CM induced cardiac fibroblast proliferation by MTT assay (**E**),  
23 migration by wound healing assay (**F**) and reduced the expression of α-SMA, vimentin (Vim), collagen  
24 type I (Col1a1), collagen type III (Col3a1) by RT-qPCR (**G**) (n=3). **H,** Klf2 overexpression in mCMVECs  
25 attenuates the TGF-β1 stimulated mCMVECs-CM induced elevation of cardiac fetal genes, such as ANP,  
26 BNP and immature cardiac gene β-MHC, and increases the expression of mature cardiac gene α-MHC

1 in cardiomyocytes by RT-qPCR (n=3). Data are means  $\pm$  S.E.M. \* $P$ <0.05, \*\* $P$ <0.01 and n.s not  
2 significant. 2-way ANOVA with Turkey test (A) and unpaired Student's t-test (B-H).

3 **Supplementary Figure 9.** Simvastatin induces KLF2 protein expression in both sham and TAC heart  
4 ECs as shown by representative western blot figures in the top and quantification in the bottom (n=3).  
5 Data are means. Data are means  $\pm$  S.E.M. \* $P$ <0.05 and \*\* $P$ <0.01 and 2-way ANOVA with Turkey test.

6 **Supplementary Figure 10.** RT-qPCR analysis of cardiac microvasculature ECs from simvastatin or  
7 vehicle treated Foxp1<sup>ECKO</sup> mutants and wild-type (WT) littermates 28 days after TAC surgery. The  
8 results show EC-Foxp1 deletion exhibited no significant change of EC-Klf2 expression but blunted the  
9 simvastatin reduced EC-TGF- $\beta$ 1 expression compared with WT mice (n=3). Data are means  $\pm$  S.E.M.  
10 \* $P$ <0.05 and \*\* $P$ <0.01 and n.s not significant and 2-way ANOVA with Turkey test.

11

Supplementary Figure 1

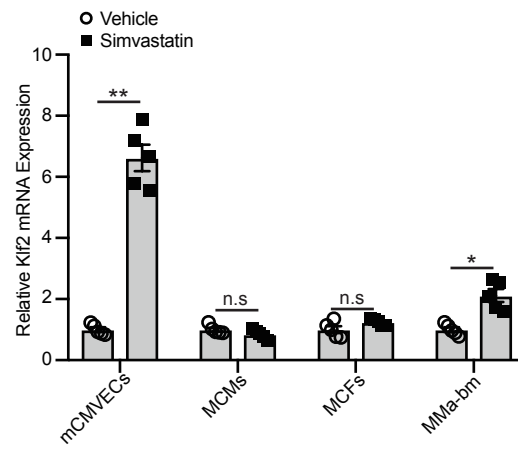

# Supplementary Figure 2

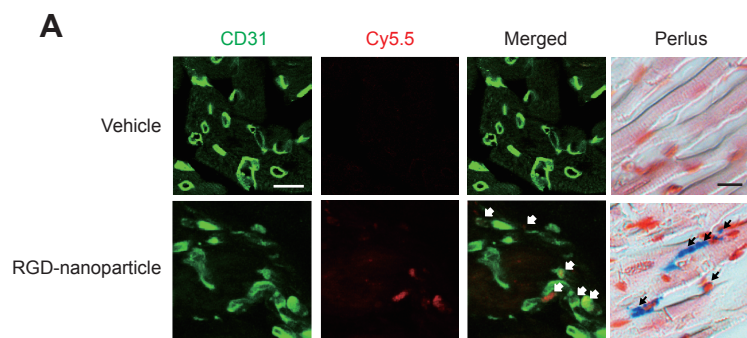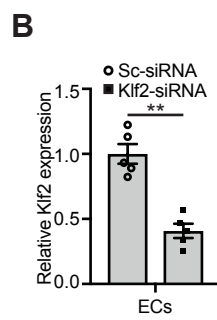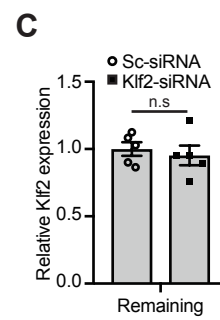

# Supplementary Figure 3

**A**

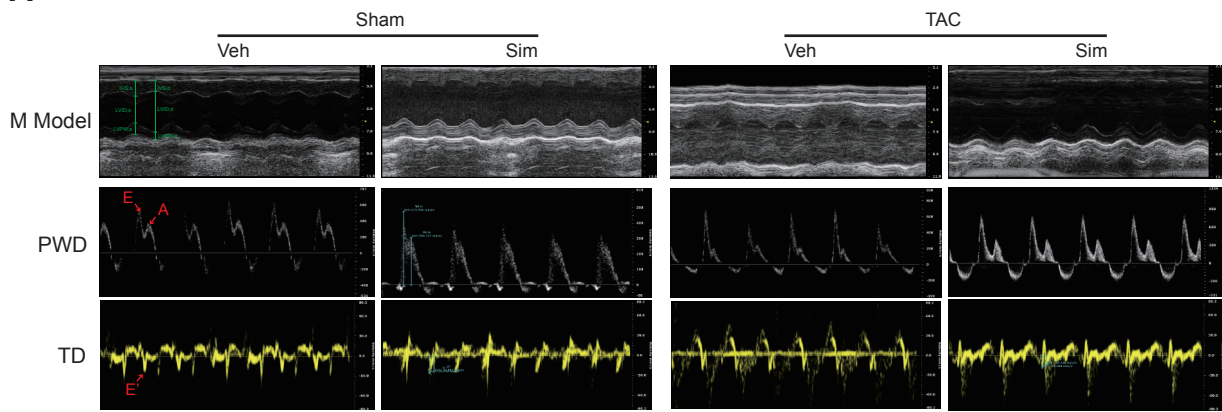

**B**

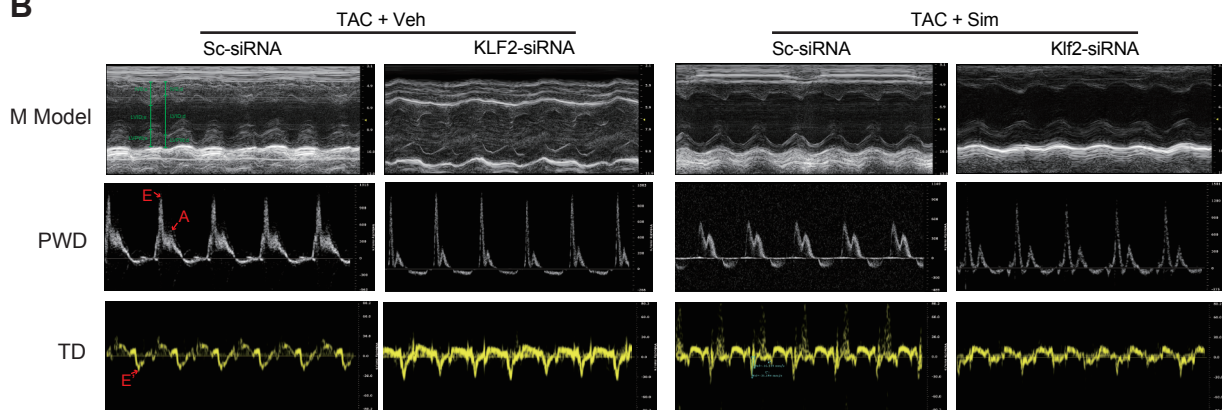

**C**

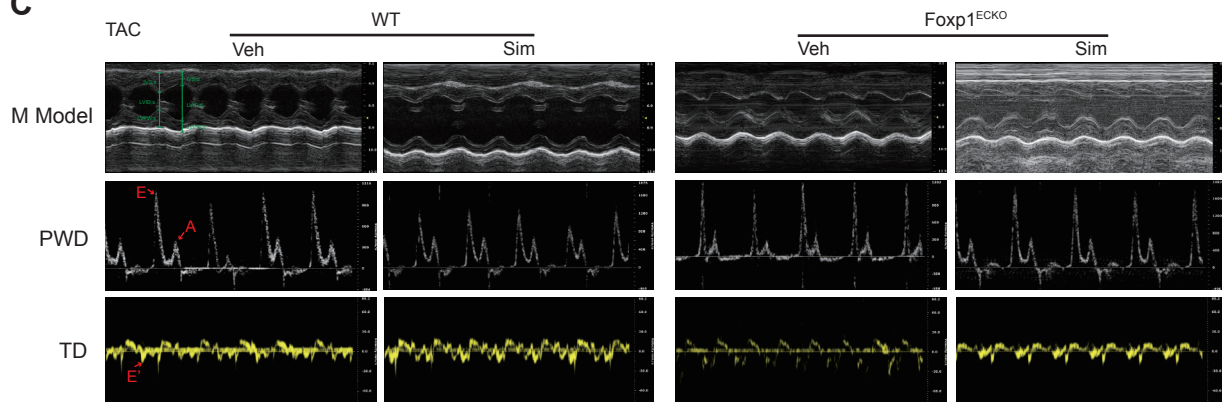

Supplementary Figure 4

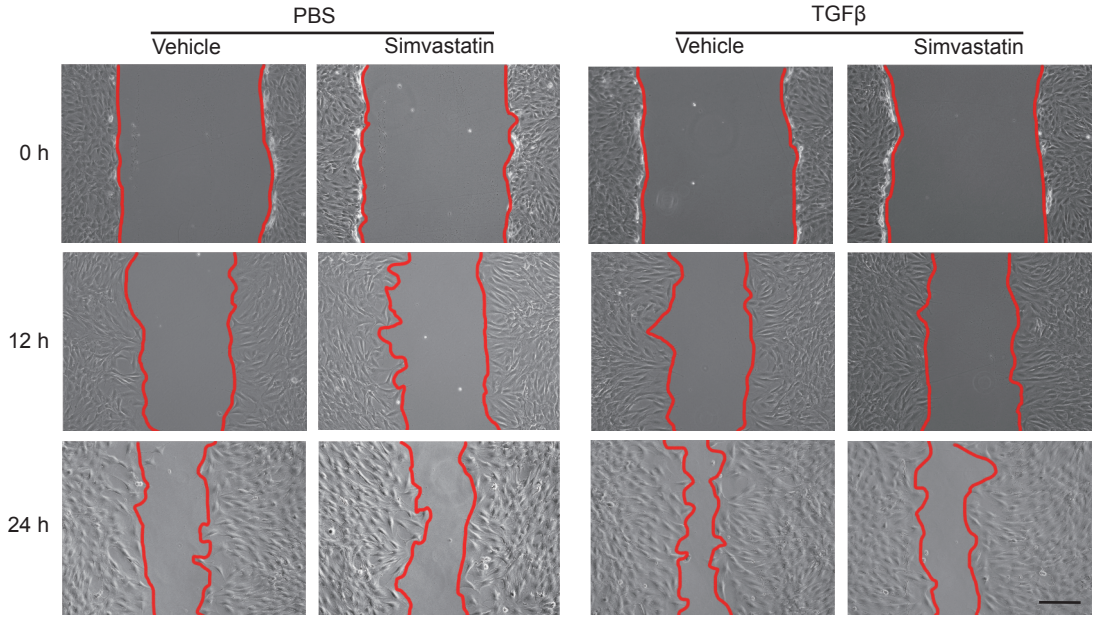

Supplementary Figure 5

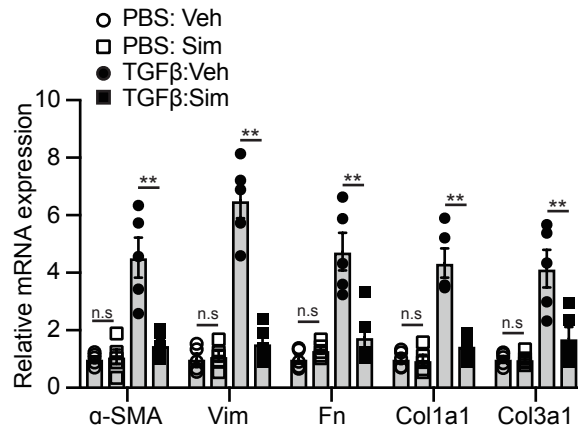



Supplementary Figure 6

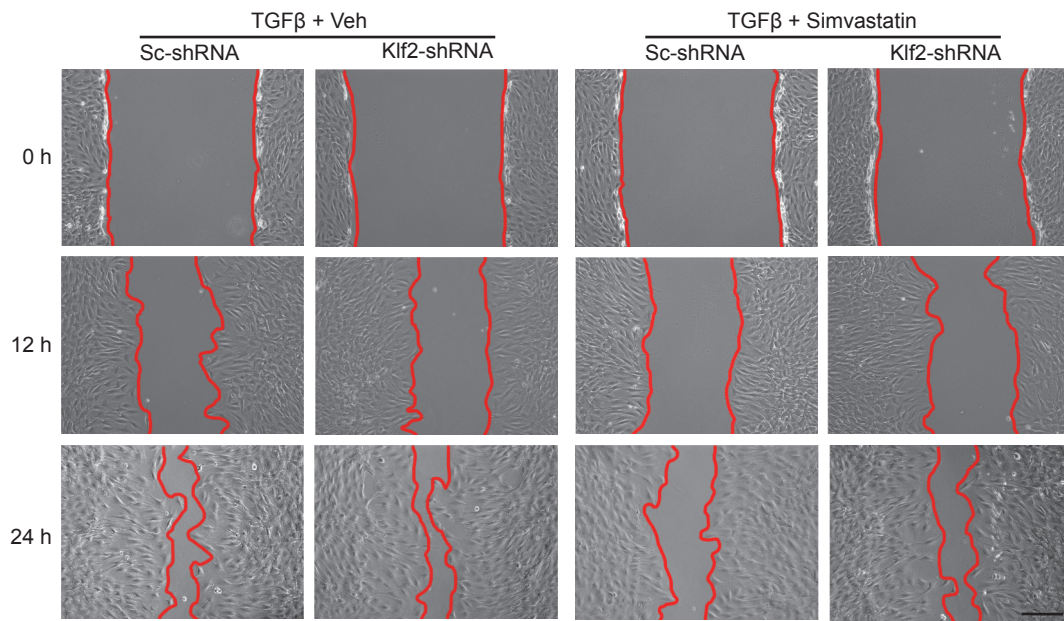

Supplementary Figure 7

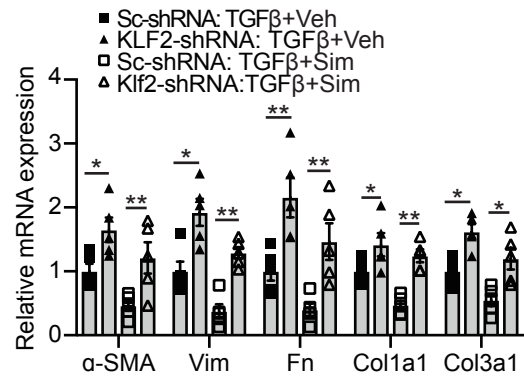

Supplementary Figure 8

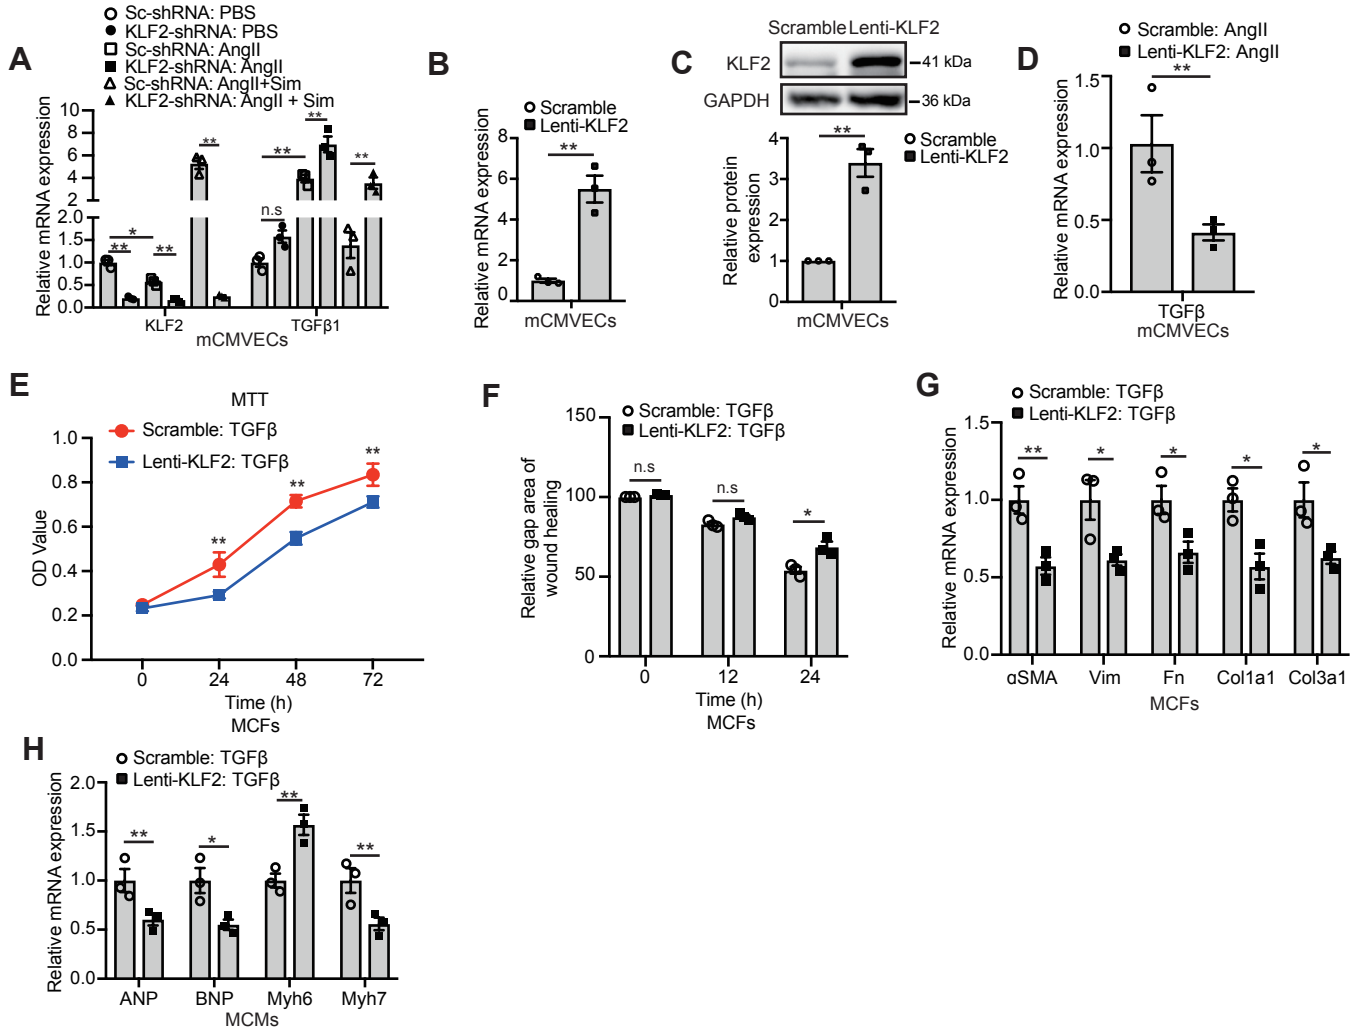

# Supplementary Figure 9

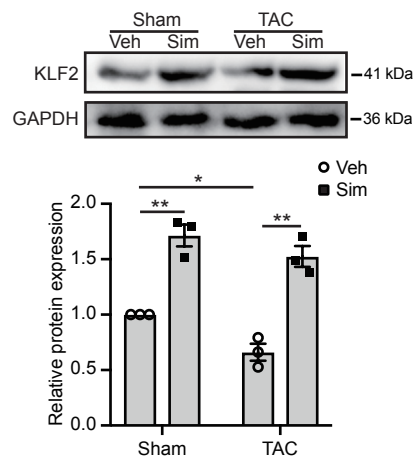

Supplementary Figure 10

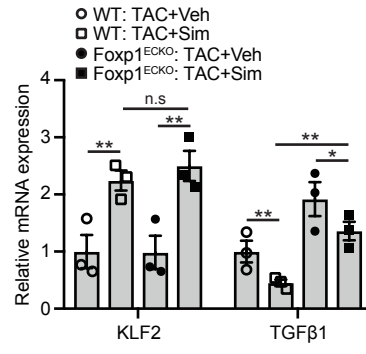

Supplement: thnov11p1609s1.pdf [file thnov11p1609s1.pdf]
